# Index

- Actin cytoskeleton
  - signal transduction through Rac and Rho: RIDLEY 127
- Apoptosis
  - role of *bcl-2* gene: HOCKENBERY 51
  - role of *p53* and *Rb-1* genes: HOOPER 13
- bcl-1* gene
  - D-type cyclin role in tumorigenesis: PETERS 89
- bcl-2* gene
  - in cancer, development and apoptosis: HOCKENBERY 51
- Breast cancer
  - D-type cyclin role in tumorigenesis: PETERS 89
- Cancer
  - role of *bcl-2* gene: HOCKENBERY 51
  - role of *p53* and *Rb-1* genes: HOOPER 13
  - tumour suppressor genes in *Drosophila*: WATSON, JUSTICE AND BRYANT 19
- Cancer syndrome, inherited
  - RET* proto-oncogene mutations: SMITH, ENG AND PONDER 43
- CCND1*
  - D-type cyclin role in tumorigenesis: PETERS 89
- cdc25*
  - role in checkpoints and feedback controls: HOFFMANN AND KARSENTI 75
- cdk (cyclin-dependent kinase)
  - cdc25* role in checkpoints and feedback controls: HOFFMANN AND KARSENTI 75
  - G<sub>1</sub> control in mammalian cells: REED, BAILLY, DULIC, HENGST, RESNITZKY AND SLINGERLAND 69
- Cell cycle
  - cdc25* role in checkpoints and feedback controls: HOFFMANN AND KARSENTI 75
  - D-type cyclin role in tumorigenesis: PETERS 89
  - G<sub>1</sub> control in mammalian cells: REED, BAILLY, DULIC, HENGST, RESNITZKY AND SLINGERLAND 69
  - regulation by *rum1*<sup>+</sup> gene: MORENO, LABIB, CORREA AND NURSE 63
- Cell death *see* Apoptosis
- Centrocytic lymphoma
  - D-type cyclin role in tumorigenesis: PETERS 89
- Checkpoint control
  - coupling of DNA replication/mitosis by fission yeast *rad4/cut5*: SAKA, FANTES AND YANAGIDA 57
- Checkpoints
  - cdc25* role: HOFFMANN AND KARSENTI 75
- Chromosome translocation
  - D-type cyclin role in tumorigenesis: PETERS 89
- CSF-1 (macrophage-specific colony-stimulating factor 1)
  - signal transduction by CSF-1R: ROUSSEL 105
- Cyclin 69
  - G<sub>1</sub> control in mammalian cells: REED, BAILLY, DULIC, HENGST, RESNITZKY AND SLINGERLAND 69
- Cyclin-dependent kinase
  - D-type cyclin role in tumorigenesis: PETERS 89
- D-type cyclins
  - role in tumorigenesis: PETERS 89
- Development
  - role of *bcl-2* gene: HOCKENBERY 51
  - role of *p53* and *Rb-1* genes: HOOPER 13
- Disease, human
  - Pax* gene in development: MANSOURI, STOYKOVA AND GRUSS 35
- DNA amplification
  - D-type cyclin role in tumorigenesis: PETERS 89
- DNA damage repair
  - coupling of DNA replication/mitosis by fission yeast *rad4/cut5*: SAKA, FANTES AND YANAGIDA 57
- DNA replication
  - coupling of DNA replication/mitosis by fission yeast *rad4/cut5*: SAKA, FANTES AND YANAGIDA 57
- DNA tumour viruses
  - D-type cyclin role in tumorigenesis: PETERS 89
- Drosophila*
  - tumour suppressor genes: WATSON, JUSTICE AND BRYANT 19
- E2F transcription factor
  - regulation by pRB and p107: DYSON 81
- Feedback control
  - cdc25* role: HOFFMANN AND KARSENTI 75
- Fission yeast *see Schizosaccharomyces pombe*
- Focal adhesion kinase
  - structure and signalling: PARSONS, SCHALLER, HILDEBRAND, LEU, RICHARDSON AND OTEY 109
- G<sub>1</sub> phase
  - control in mammalian cells: REED, BAILLY, DULIC, HENGST, RESNITZKY AND SLINGERLAND 69
- Genomic imprinting
  - developmental context for multiple genetic alterations in Wilms' tumour: FEINBERG 7
- GTPase
  - signal transduction through Rac and Rho: RIDLEY 127
- H19
  - developmental context for multiple genetic alterations in Wilms' tumour: FEINBERG 7
- Hirschsprung disease
  - RET* proto-oncogene mutations: SMITH, ENG AND PONDER 43
- Human disease
  - Pax* gene in development: MANSOURI, STOYKOVA AND GRUSS 35
- IGF2
  - developmental context for multiple genetic alterations in Wilms' tumour: FEINBERG 7
- Inherited cancer syndrome
  - RET* proto-oncogene mutations: SMITH, ENG AND PONDER 43
- Integrin
  - focal adhesion kinase structure/signalling: PSHLRO 109

- Kinase cascade  
regulation and function in *Xenopus* oocytes: KOSAKO, GOTOH AND NISHIDA 115
- Loss-of-function mutation  
tumour suppressor genes in *Drosophila*: WATSON, JUSTICE and BRYANT 19
- Lysophosphatidic acid  
signal transduction through Rac and Rho: RIDLEY 127
- MAP kinase cascade  
regulation and function: KOSAKO, GOTOH AND NISHIDA 115
- MEN 2 (*see* Multiple endocrine neoplasia type 2 syndromes)
- Mitosis  
coupling of DNA replication/mitosis by fission yeast *rad4/cut5*: SAKA, FANTES AND YANAGIDA 57
- MPF (maturation promoting factor)  
regulation and function of MAP kinase cascade: KOSAKO, GOTOH AND NISHIDA 115
- Multiple endocrine neoplasia type 2 syndromes  
*RET* proto-oncogene mutations: SMITH, ENG AND PONDER 43
- Mutant  
*Pax* gene in development: MANSOURI, STOYKOVA AND GRUSS 35
- Oncogene  
*bcl-2* in cancer, development and apoptosis: HOCKENBERY 51  
coupling of DNA replication/mitosis by fission yeast *rad4/cut5*: SAKA, FANTES AND YANAGIDA 57
- Oncosuppressor genes  
role of *p53* and *Rb-1* genes in cancer, development and apoptosis: HOOPER 13
- Oocyte maturation  
regulation and function of MAP kinase cascade: KOSAKO, GOTOH AND NISHIDA 115
- Oxidative stress  
*bcl-2* in cancer, development and apoptosis: HOCKENBERY 51
- p107  
regulation of E2F transcription factor: DYSON 81
- p53* gene  
in cancer, development and apoptosis: HOOPER 13
- Pax* gene  
in development: MANSOURI, STOYKOVA AND GRUSS 35
- Paxillin  
focal adhesion kinase structure/signalling: PSHLRO 109
- Phosphopeptides  
recognition by src-homology 2 domains: CANTLEY AND SONGYANG 121
- Phosphorylation  
*cdc25* role in checkpoints and feedback controls: HK 75
- pRB *see* Retinoblastoma tumour suppression
- Protein tyrosine kinase  
structure and function of SH2 domains: MARENGERE AND PAWSON 97
- PSD-95/SAP90  
tumour suppressor genes in *Drosophila*: WATSON, JUSTICE AND BRYANT 19
- Rac protein  
signal transduction through: RIDLEY 127
- Rb-1* gene  
in cancer, development and apoptosis: HOOPER 13
- Receptor tyrosine kinase  
*RET* proto-oncogene mutations: SMITH, ENG AND PONDER 43
- Regulation  
E2F transcription factor: DYSON 81
- RET* proto-oncogene  
mutations: SMITH, ENG AND PONDER 43
- Retinoblastoma tumour suppression  
D-type cyclin role in tumorigenesis: PETERS 89  
*Rb-1* gene, HOOPER 13  
regulation of E2F transcription factor: DYSON 81
- Retroviral integration  
D-type cyclin role in tumorigenesis: PETERS 89
- rho protein  
signal transduction through: RIDLEY 127
- rum1*<sup>+</sup> gene  
regulation of Start in fission yeast: MORENO, LABIB, CORREA AND NURSE 63
- Schizosaccharomyces pombe*  
coupling of DNA replication and mitosis: SAKA, FANTES AND YANAGIDA 57  
regulation of Start by *rum1*<sup>+</sup> gene: MORENO, LABIB, CORREA AND NURSE 63
- SH2 domain  
phosphopeptide recognition: CANTLEY AND SONGYANG 121  
structure and function: MARENGERE AND PAWSON 97
- SH3 domain  
phosphopeptide recognition: CANTLEY AND SONGYANG 121
- Signal transduction  
by CSF-1R: ROUSSEL 105  
structure and function of SH2 domains: MARENGERE AND PAWSON 97
- Start  
cell cycle timing by *rum1*<sup>+</sup> gene: MORENO, LABIB, CORREA AND NURSE 63
- Tumorigenesis  
role of D-type cyclins: PETERS 89
- Tumour suppression  
disrupted development in Wilm's tumour: MIYAGAWA, KENT, SCHEDI, VAN HEYNINGEN AND HASTIE 1
- Tumour suppressor gene 11p15  
developmental context for multiple genetic alterations in Wilms' tumour: FEINBERG 7  
*Drosophila*: WATSON, JUSTICE AND BRYANT 19
- Tyrosine kinase  
SH2 domain recognition of phosphopeptides: CANTLEY AND SONGYANG 121
- Wilms' tumour  
developmental context for multiple genetic alterations: FEINBERG 7  
disrupted development: MIYAGAWA, KENT, SCHEDI, VAN HEYNINGEN AND HASTIE 1

**WT1 gene**

- developmental context for multiple genetic alterations in Wilms' tumour: FEINBERG 7
- disrupted development in Wilm's tumour: MIYAGAWA, KENT, SCHEDI, VAN HEYNINGEN AND HASTIE 1

***Xenopus* oocytes**

- MAP kinase cascade: KOSAKO, GOTOH AND NISHIDA 115

Yeast, fission *see Schizosaccharomyces pombe*

**Zinc finger**

- disrupted development in Wilm's tumour: MIYAGAWA, KENT, SCHEDI, VAN HEYNINGEN AND HASTIE 1

**ZO-1/ZO-2**

- tumour suppressor genes in *Drosophila*: WATSON, JUSTICE AND BRYANT 19
